# Supplementary material for: KNa2La2(BO3)3: a shortite-type lanthanide borate exhibiting strong nonlinear optical activity induced by isolated [BO3] triangles and distorted [LaO9] polyhedra
Source: Royal Society of Chemistry journal article supplement (doi:10.1039/d3qi01004j), 2023-01-01
Supplement: d3qi01004j1.pdf [file d3qi01004j1.pdf]

## Electronic Supplementary Information (ESI)

### **KNa<sub>2</sub>La<sub>2</sub>(BO<sub>3</sub>)<sub>3</sub>: A Shortite-Type Lanthanide Borate Exhibiting Strong Nonlinear Optical Activities Induced by Isolated [BO<sub>3</sub>] triangles and Distorted [LaO<sub>9</sub>] Polyhedra**

Jie Song,<sup>a</sup> Conggang Li,<sup>\*a</sup> Jinmiao Jiao,<sup>a</sup> Yuheng She,<sup>a</sup> Wenli Zhao,<sup>a</sup> Fei Liang,<sup>\*b</sup> Ning Ye,<sup>a</sup>

Zhanggui Hu,<sup>\*a</sup> and Yicheng Wu<sup>a</sup>

*<sup>a</sup>Tianjin Key Laboratory of Functional Crystal Materials, Institute of Functional Crystal, Tianjin University of Technology, Tianjin 300384, China.*

*<sup>b</sup>State Key Laboratory of Crystal Materials and Institute of Crystal Materials, Shandong University, Jinan 250100, China.*

Corresponding Author E-mail: [cgli@email.tjut.edu.cn](mailto:cgli@email.tjut.edu.cn)

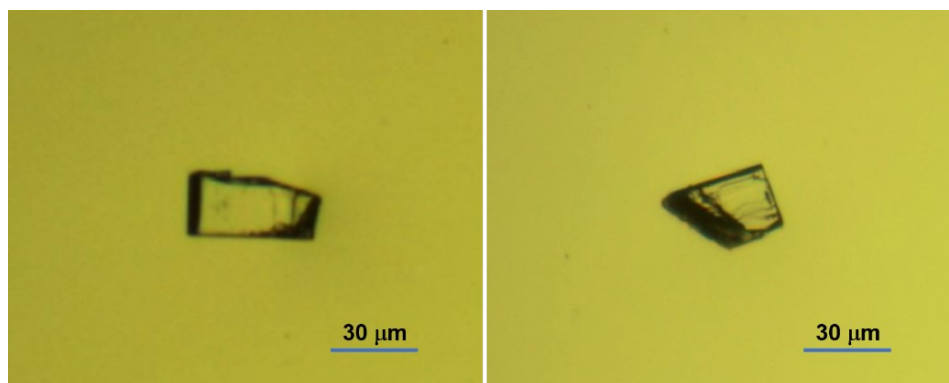

Fig S1. The as-grown  $\text{KNa}_2\text{La}_2(\text{BO}_3)_3$  crystals by using a flux method.

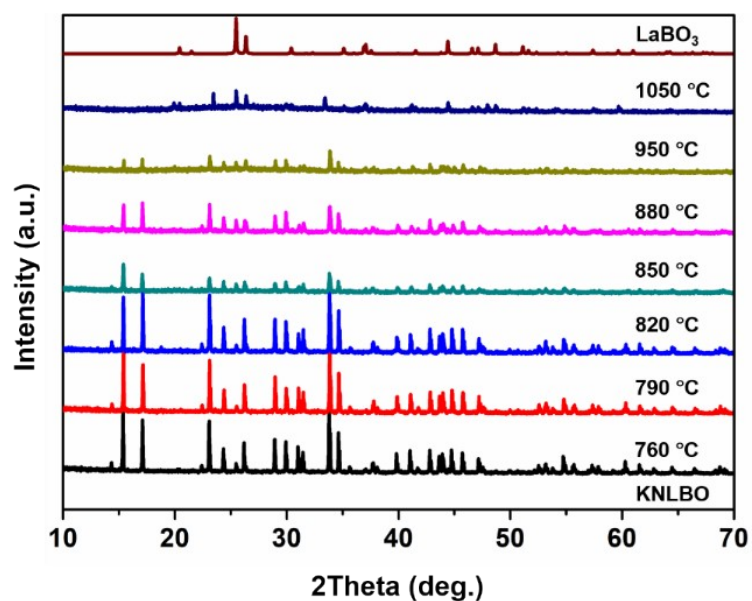

Fig S2. The variable temperature PXRD measurement ranging from 760 to 1050 °C for  $\text{KNa}_2\text{La}_2(\text{BO}_3)_3$ .

**Table S1.** Atomic coordinates and equivalent isotropic atomic displacement parameters ( $\text{\AA}^2$ ) for  $\text{KNa}_2\text{La}_2(\text{BO}_3)_3$ .

| Atoms | x        | y        | z         | U(eq) |
|-------|----------|----------|-----------|-------|
| La(1) | 0        | 7136(1)  | 7051(1)   | 6(1)  |
| K(1)  | 5000     | 5000     | 3138(8)   | 23(1) |
| Na(1) | 5000     | 5000     | 7987(11)  | 7(2)  |
| Na(2) | 0        | 5000     | 10587(15) | 16(2) |
| O(1)  | 0        | 6037(10) | 3895(16)  | 9(2)  |
| O(2)  | 7346(15) | 1545(8)  | 4951(11)  | 10(1) |
| O(3)  | 5000     | 3179(12) | 6190(17)  | 16(2) |
| O(4)  | 0        | 5000     | 6710(20)  | 14(4) |
| B(1)  | 5000     | 2120(14) | 5310(20)  | 10(3) |
| B(2)  | 0        | 5000     | 4800(30)  | 10(4) |

**Table 2.** Bond lengths [ $\text{\AA}$ ] and angles [ $^\circ$ ] for  $\text{KNa}_2\text{La}_2(\text{BO}_3)_3$ .

|             |            |                    |            |
|-------------|------------|--------------------|------------|
| La(1)-O(1)  | 2.492(10)  | O(2)4-Na(1)-B(1)2  | 104.1(4)   |
| La(1)-O(1)  | 2.628(12)  | O(2)-Na(1)-B(1)3   | 104.1(4)   |
| La(1)-O(2)  | 2.618(8)   | O(2)-Na(1)-B(1)2   | 28.37(19)  |
| La(1)-O(2)  | 2.558(8)   | O(3)-Na(1)-Na(2)   | 108.32(19) |
| La(1)-O(2)  | 2.558(8)   | O(3)-Na(1)-Na(2)   | 108.32(19) |
| La(1)-O(2)  | 2.618(8)   | O(3)-Na(1)-Na(2)   | 108.32(19) |
| La(1)-O(3)  | 2.696(4)   | O(3)-Na(1)-Na(2)   | 108.32(19) |
| La(1)-O(3)  | 2.696(4)   | O(3)-Na(1)-O(2)4   | 73.4(3)    |
| La(1)-O(4)  | 2.4639(17) | O(3)-Na(1)-O(2)    | 73.4(3)    |
| La(1)-B(1)  | 3.014(9)   | O(3)-Na(1)-O(2)2   | 151.1(2)   |
| La(1)-B(1)  | 3.014(9)   | O(3)-Na(1)-O(2)    | 151.1(2)   |
| La(1)-B(2)  | 2.951(14)  | O(3)-Na(1)-O(2)4   | 151.1(2)   |
| K(1)-O(1)   | 2.909(5)   | O(3)-Na(1)-O(2)3   | 151.1(2)   |
| K(1)-O(1)   | 2.909(5)   | O(3)-Na(1)-O(2)3   | 73.4(3)    |
| K(1)-O(1)   | 2.909(5)   | O(3)-Na(1)-O(2)2   | 73.4(3)    |
| K(1)-O(1)   | 2.909(5)   | O(3)-Na(1)-O(3)    | 115.7(7)   |
| K(1)-O(2)   | 3.170(10)  | O(3)-Na(1)-O(4)    | 79.6(2)    |
| K(1)-O(2)   | 3.170(10)  | O(3)-Na(1)-O(4)    | 79.6(2)    |
| K(1)-O(2)0  | 3.170(10)  | O(3)-Na(1)-O(4)    | 79.6(2)    |
| K(1)-O(2)1  | 3.170(10)  | O(3)-Na(1)-O(4)    | 79.6(2)    |
| K(1)-O(3)   | 3.056(15)  | O(3)-Na(1)-B(1)2   | 177.2(6)   |
| K(1)-O(3)   | 3.056(15)  | O(3)-Na(1)-B(1)3   | 177.2(6)   |
| K(1)-B(2)   | 2.867(11)  | O(3)-Na(1)-B(1)2   | 67.1(4)    |
| K(1)-B(2)   | 2.867(11)  | O(3)-Na(1)-B(1)3   | 67.1(4)    |
| Na(1)-Na(2) | 3.218(8)   | O(4)-Na(1)-Na(2)   | 163.6(4)   |
| Na(1)-Na(2) | 3.218(8)   | O(4)-Na(1)-Na(2)   | 163.6(4)   |
| Na(1)-O(2)2 | 2.586(9)   | O(4)-Na(1)-Na(2)   | 56.0(3)    |
| Na(1)-O(2)3 | 2.586(9)   | O(4)-Na(1)-Na(2)   | 56.0(3)    |
| Na(1)-O(2)  | 2.586(9)   | O(4)-Na(1)-O(4)    | 140.4(7)   |
| Na(1)-O(2)4 | 2.586(9)   | O(4)-Na(1)-B(1)2   | 101.20(19) |
| Na(1)-O(3)  | 2.468(13)  | O(4)-Na(1)-B(1)3   | 101.20(19) |
| Na(1)-O(3)  | 2.468(13)  | O(4)-Na(1)-B(1)2   | 101.20(19) |
| Na(1)-O(4)  | 2.760(6)   | O(4)-Na(1)-B(1)3   | 101.20(19) |
| Na(1)-O(4)  | 2.760(6)   | B(1)2-Na(1)-Na(2)  | 70.2(2)    |
| Na(1)-B(1)2 | 2.967(19)  | B(1)2-Na(1)-Na(2)  | 70.2(2)    |
| Na(1)-B(1)3 | 2.967(19)  | B(1)3-Na(1)-Na(2)  | 70.2(2)    |
| Na(2)-O(1)5 | 2.694(16)  | B(1)3-Na(1)-Na(2)  | 70.2(2)    |
| Na(2)-O(1)6 | 2.694(16)  | B(1)2-Na(1)-B(1)3  | 110.1(7)   |
| Na(2)-O(2)  | 2.293(9)   | K(1)6-Na(2)-K(1)8  | 108.7(4)   |
| Na(2)-O(2)3 | 2.293(9)   | K(1)8-Na(2)-Na(1)9 | 71.87(15)  |
| Na(2)-O(2)  | 2.293(9)   | K(1)6-Na(2)-Na(1)  | 71.87(15)  |
| Na(2)-O(2)7 | 2.293(9)   | K(1)6-Na(2)-Na(1)9 | 179.5(4)   |
| O(1)-B(2)   | 1.361(16)  | O(1)6-Na(2)-K(1)6  | 58.45(19)  |

---

|                 |            |                    |            |
|-----------------|------------|--------------------|------------|
| O(2)-B(1)       | 1.410(11)  | O(1)5-Na(2)-K(1)8  | 58.45(19)  |
| O(3)-B(1)       | 1.37(2)    | O(1)6-Na(2)-K(1)8  | 58.45(19)  |
| O(4)-B(2)       | 1.39(3)    | O(1)5-Na(2)-K(1)6  | 58.45(19)  |
| O(1)-La(1)-O(1) | 151.4(3)   | O(1)6-Na(2)-Na(1)9 | 122.00(16) |
| O(1)-La(1)-O(2) | 77.3(3)    | O(1)5-Na(2)-Na(1)  | 122.00(16) |
| O(1)-La(1)-O(2) | 80.0(3)    | O(1)5-Na(2)-Na(1)9 | 122.00(17) |
| O(1)-La(1)-O(2) | 80.0(3)    | O(1)6-Na(2)-Na(1)  | 122.00(16) |
| O(1)-La(1)-O(2) | 77.3(3)    | O(1)6-Na(2)-O(1)5  | 52.4(5)    |
| O(1)-La(1)-O(3) | 103.8(3)   | O(1)6-Na(2)-O(4)   | 153.8(2)   |
| O(1)-La(1)-O(3) | 74.4(3)    | O(1)5-Na(2)-O(4)   | 153.8(2)   |
| O(1)-La(1)-O(3) | 103.8(3)   | O(1)6-Na(2)-B(2)6  | 26.2(2)    |
| O(1)-La(1)-O(3) | 74.4(3)    | O(1)5-Na(2)-B(2)6  | 26.2(2)    |
| O(1)-La(1)-B(1) | 89.4(3)    | O(2)-Na(2)-K(1)8   | 68.3(2)    |
| O(1)-La(1)-B(1) | 89.4(3)    | O(2)3-Na(2)-K(1)8  | 127.3(3)   |
| O(1)-La(1)-B(1) | 76.5(3)    | O(2)3-Na(2)-K(1)6  | 68.3(2)    |
| O(1)-La(1)-B(1) | 76.5(3)    | O(2)-Na(2)-K(1)6   | 127.3(3)   |
| O(1)-La(1)-B(2) | 27.5(5)    | O(2)7-Na(2)-K(1)6  | 127.3(3)   |
| O(1)-La(1)-B(2) | 178.9(5)   | O(2)7-Na(2)-K(1)8  | 68.3(2)    |
| O(2)-La(1)-O(1) | 76.0(3)    | O(2)-Na(2)-K(1)6   | 68.3(2)    |
| O(2)-La(1)-O(1) | 76.0(3)    | O(2)-Na(2)-K(1)8   | 127.3(3)   |
| O(2)-La(1)-O(1) | 125.9(3)   | O(2)-Na(2)-Na(1)9  | 111.4(4)   |
| O(2)-La(1)-O(1) | 125.9(3)   | O(2)-Na(2)-Na(1)   | 111.4(4)   |
| O(2)-La(1)-O(2) | 63.6(3)    | O(2)3-Na(2)-Na(1)  | 52.8(2)    |
| O(2)-La(1)-O(2) | 65.2(4)    | O(2)-Na(2)-Na(1)9  | 52.8(2)    |
| O(2)-La(1)-O(2) | 157.33(19) | O(2)3-Na(2)-Na(1)9 | 111.4(4)   |
| O(2)-La(1)-O(2) | 157.33(19) | O(2)7-Na(2)-Na(1)9 | 52.8(2)    |
| O(2)-La(1)-O(2) | 110.8(3)   | O(2)-Na(2)-Na(1)   | 52.8(2)    |
| O(2)-La(1)-O(2) | 110.8(3)   | O(2)7-Na(2)-Na(1)  | 111.4(4)   |
| O(2)-La(1)-O(3) | 131.4(3)   | O(2)-Na(2)-O(1)5   | 121.5(4)   |
| O(2)-La(1)-O(3) | 54.6(3)    | O(2)7-Na(2)-O(1)5  | 80.8(3)    |
| O(2)-La(1)-O(3) | 69.3(3)    | O(2)-Na(2)-O(1)5   | 121.5(4)   |
| O(2)-La(1)-O(3) | 54.6(3)    | O(2)3-Na(2)-O(1)6  | 121.5(4)   |
| O(2)-La(1)-O(3) | 131.4(3)   | O(2)-Na(2)-O(1)6   | 80.8(3)    |
| O(2)-La(1)-O(3) | 117.3(3)   | O(2)-Na(2)-O(1)6   | 80.8(3)    |
| O(2)-La(1)-O(3) | 117.3(3)   | O(2)7-Na(2)-O(1)6  | 121.5(4)   |
| O(2)-La(1)-O(3) | 69.3(3)    | O(2)3-Na(2)-O(1)5  | 80.8(3)    |
| O(2)-La(1)-B(1) | 27.8(3)    | O(2)7-Na(2)-O(2)   | 101.2(4)   |
| O(2)-La(1)-B(1) | 150.3(4)   | O(2)7-Na(2)-O(2)   | 156.6(7)   |
| O(2)-La(1)-B(1) | 150.3(4)   | O(2)-Na(2)-O(2)    | 73.9(4)    |
| O(2)-La(1)-B(1) | 87.8(4)    | O(2)3-Na(2)-O(2)   | 156.6(7)   |
| O(2)-La(1)-B(1) | 87.8(4)    | O(2)7-Na(2)-O(2)3  | 73.9(4)    |
| O(2)-La(1)-B(1) | 92.5(4)    | O(2)-Na(2)-O(4)    | 78.3(3)    |
| O(2)-La(1)-B(1) | 27.8(3)    | O(2)7-Na(2)-O(4)   | 78.3(3)    |
| O(2)-La(1)-B(2) | 103.6(4)   | O(2)-Na(2)-O(4)    | 78.3(3)    |

---

---

|                 |          |                    |            |
|-----------------|----------|--------------------|------------|
| O(2)-La(1)-B(2) | 99.0(4)  | O(2)3-Na(2)-O(4)   | 78.3(3)    |
| O(2)-La(1)-B(2) | 103.6(4) | O(2)7-Na(2)-B(2)6  | 101.7(3)   |
| O(2)-La(1)-B(2) | 99.0(4)  | O(2)-Na(2)-B(2)6   | 101.7(3)   |
| O(3)-La(1)-O(3) | 148.8(6) | O(2)3-Na(2)-B(2)6  | 101.7(3)   |
| O(3)-La(1)-B(1) | 27.1(4)  | O(2)-Na(2)-B(2)6   | 101.7(3)   |
| O(3)-La(1)-B(1) | 140.3(4) | O(4)-Na(2)-K(1)6   | 125.67(18) |
| O(3)-La(1)-B(1) | 140.3(4) | O(4)-Na(2)-K(1)8   | 125.67(18) |
| O(3)-La(1)-B(1) | 27.1(4)  | O(4)-Na(2)-Na(1)   | 53.8(2)    |
| O(3)-La(1)-B(2) | 76.0(3)  | O(4)-Na(2)-Na(1)9  | 53.8(2)    |
| O(3)-La(1)-B(2) | 76.0(3)  | O(4)-Na(2)-B(2)6   | 180        |
| O(4)-La(1)-O(1) | 153.1(4) | B(2)6-Na(2)-K(1)8  | 54.33(18)  |
| O(4)-La(1)-O(1) | 55.5(4)  | B(2)6-Na(2)-K(1)6  | 54.33(18)  |
| O(4)-La(1)-O(2) | 121.8(3) | B(2)6-Na(2)-Na(1)9 | 126.2(2)   |
| O(4)-La(1)-O(2) | 79.9(3)  | B(2)6-Na(2)-Na(1)  | 126.2(2)   |
| O(4)-La(1)-O(2) | 79.9(3)  | La(1)0-O(1)-La(1)  | 94.1(4)    |
| O(4)-La(1)-O(2) | 121.8(3) | La(1)-O(1)-K(1)    | 111.3(3)   |
| O(4)-La(1)-O(3) | 81.0(3)  | La(1)0-O(1)-K(1)9  | 103.9(2)   |
| O(4)-La(1)-O(3) | 81.0(3)  | La(1)-O(1)-K(1)9   | 111.3(3)   |
| O(4)-La(1)-B(1) | 103.8(3) | La(1)0-O(1)-K(1)   | 103.9(2)   |
| O(4)-La(1)-B(1) | 103.8(3) | La(1)0-O(1)-Na(2)1 | 83.4(3)    |
| O(4)-La(1)-B(2) | 28.0(5)  | La(1)-O(1)-Na(2)1  | 177.5(4)   |
| B(1)-La(1)-B(1) | 119.0(6) | K(1)9-O(1)-K(1)    | 126.4(4)   |
| B(2)-La(1)-B(1) | 90.0(4)  | Na(2)1-O(1)-K(1)9  | 69.4(3)    |
| B(2)-La(1)-B(1) | 90.0(4)  | Na(2)1-O(1)-K(1)   | 69.4(3)    |
| O(1)-K(1)-O(1)  | 158.1(5) | B(2)-O(1)-La(1)0   | 176.3(13)  |
| O(1)-K(1)-O(1)  | 48.3(4)  | B(2)-O(1)-La(1)    | 89.6(11)   |
| O(1)-K(1)-O(1)  | 126.4(4) | B(2)-O(1)-K(1)9    | 74.6(5)    |
| O(1)-K(1)-O(1)  | 48.3(4)  | B(2)-O(1)-K(1)     | 74.6(5)    |
| O(1)-K(1)-O(1)  | 126.4(4) | B(2)-O(1)-Na(2)1   | 92.9(11)   |
| O(1)-K(1)-O(1)  | 158.1(5) | La(1)-O(2)-La(1)2  | 92.8(3)    |
| O(1)-K(1)-O(2)1 | 135.3(3) | La(1)2-O(2)-K(1)3  | 160.4(3)   |
| O(1)-K(1)-O(2)  | 135.3(3) | La(1)-O(2)-K(1)3   | 95.6(2)    |
| O(1)-K(1)-O(2)1 | 91.5(3)  | La(1)-O(2)-Na(1)4  | 172.9(4)   |
| O(1)-K(1)-O(2)1 | 104.7(3) | Na(1)4-O(2)-La(1)2 | 88.6(3)    |
| O(1)-K(1)-O(2)  | 64.4(3)  | Na(1)4-O(2)-K(1)3  | 81.0(3)    |
| O(1)-K(1)-O(2)  | 64.4(3)  | Na(2)2-O(2)-La(1)  | 90.7(3)    |
| O(1)-K(1)-O(2)0 | 64.4(3)  | Na(2)2-O(2)-La(1)2 | 92.8(3)    |
| O(1)-K(1)-O(2)1 | 64.4(3)  | Na(2)2-O(2)-K(1)3  | 69.5(3)    |
| O(1)-K(1)-O(2)  | 135.3(3) | Na(2)2-O(2)-Na(1)4 | 82.3(3)    |
| O(1)-K(1)-O(2)  | 104.7(3) | B(1)-O(2)-La(1)    | 94.4(7)    |
| O(1)-K(1)-O(2)0 | 135.3(3) | B(1)-O(2)-La(1)2   | 119.0(8)   |
| O(1)-K(1)-O(2)0 | 91.5(3)  | B(1)-O(2)-K(1)3    | 78.0(7)    |
| O(1)-K(1)-O(2)  | 91.5(3)  | B(1)-O(2)-Na(1)4   | 91.0(7)    |
| O(1)-K(1)-O(2)0 | 104.7(3) | B(1)-O(2)-Na(2)2   | 147.4(8)   |

---

---

|                  |            |                   |           |
|------------------|------------|-------------------|-----------|
| O(1)-K(1)-O(2)   | 104.7(3)   | La(1)-O(3)-La(1)  | 148.8(6)  |
| O(1)-K(1)-O(2)   | 91.5(3)    | La(1)-O(3)-K(1)   | 105.2(3)  |
| O(1)-K(1)-O(3)   | 98.1(3)    | La(1)-O(3)-K(1)   | 105.2(3)  |
| O(1)-K(1)-O(3)   | 98.1(3)    | Na(1)-O(3)-La(1)  | 89.4(3)   |
| O(1)-K(1)-O(3)   | 65.3(2)    | Na(1)-O(3)-La(1)  | 89.4(3)   |
| O(1)-K(1)-O(3)   | 65.3(2)    | Na(1)-O(3)-K(1)   | 79.0(4)   |
| O(1)-K(1)-O(3)   | 98.1(3)    | B(1)-O(3)-La(1)   | 89.4(4)   |
| O(1)-K(1)-O(3)   | 98.1(3)    | B(1)-O(3)-La(1)   | 89.4(4)   |
| O(1)-K(1)-O(3)   | 65.3(2)    | B(1)-O(3)-K(1)    | 105.3(9)  |
| O(1)-K(1)-O(3)   | 65.3(2)    | B(1)-O(3)-Na(1)   | 175.7(11) |
| O(2)1-K(1)-O(2)  | 68.0(3)    | La(1)-O(4)-La(1)  | 168.3(7)  |
| O(2)1-K(1)-O(2)  | 85.4(3)    | La(1)-O(4)-Na(1)9 | 88.02(15) |
| O(2)0-K(1)-O(2)  | 68.0(3)    | La(1)-O(4)-Na(1)9 | 88.02(15) |
| O(2)1-K(1)-O(2)0 | 45.2(3)    | La(1)-O(4)-Na(1)  | 88.02(15) |
| O(2)0-K(1)-O(2)  | 85.4(3)    | La(1)-O(4)-Na(1)  | 88.02(15) |
| O(2)-K(1)-O(2)   | 45.2(3)    | La(1)-O(4)-Na(2)  | 84.1(3)   |
| O(3)-K(1)-O(2)   | 98.9(3)    | La(1)-O(4)-Na(2)  | 84.1(3)   |
| O(3)-K(1)-O(2)0  | 98.9(3)    | Na(1)-O(4)-Na(1)9 | 140.4(7)  |
| O(3)-K(1)-O(2)   | 156.69(16) | Na(1)-O(4)-Na(2)  | 70.2(3)   |
| O(3)-K(1)-O(2)0  | 156.69(16) | Na(1)9-O(4)-Na(2) | 70.2(3)   |
| O(3)-K(1)-O(2)1  | 156.69(16) | B(2)-O(4)-La(1)   | 95.9(3)   |
| O(3)-K(1)-O(2)1  | 98.9(3)    | B(2)-O(4)-La(1)   | 95.9(3)   |
| O(3)-K(1)-O(2)   | 156.69(16) | B(2)-O(4)-Na(1)9  | 109.8(3)  |
| O(3)-K(1)-O(2)   | 98.9(3)    | B(2)-O(4)-Na(1)   | 109.8(3)  |
| O(3)-K(1)-O(3)   | 86.3(5)    | B(2)-O(4)-Na(2)   | 180       |
| B(2)-K(1)-O(1)   | 27.2(3)    | La(1)-B(1)-La(1)  | 119.0(6)  |
| B(2)-K(1)-O(1)   | 136.7(5)   | La(1)-B(1)-K(1)3  | 86.7(4)   |
| B(2)-K(1)-O(1)   | 27.2(3)    | La(1)-B(1)-K(1)3  | 86.7(4)   |
| B(2)-K(1)-O(1)   | 27.2(3)    | Na(1)4-B(1)-La(1) | 118.3(3)  |
| B(2)-K(1)-O(1)   | 27.2(3)    | Na(1)4-B(1)-La(1) | 118.3(3)  |
| B(2)-K(1)-O(1)   | 136.7(5)   | Na(1)4-B(1)-K(1)3 | 75.3(4)   |
| B(2)-K(1)-O(1)   | 136.7(5)   | O(2)5-B(1)-La(1)  | 162.8(10) |
| B(2)-K(1)-O(1)   | 136.7(5)   | O(2)-B(1)-La(1)   | 162.8(10) |
| B(2)-K(1)-O(2)1  | 87.9(4)    | O(2)-B(1)-La(1)   | 57.8(5)   |
| B(2)-K(1)-O(2)   | 131.3(4)   | O(2)5-B(1)-La(1)  | 57.8(5)   |
| B(2)-K(1)-O(2)0  | 131.3(4)   | O(2)5-B(1)-K(1)3  | 76.4(7)   |
| B(2)-K(1)-O(2)   | 87.9(4)    | O(2)-B(1)-K(1)3   | 76.4(7)   |
| B(2)-K(1)-O(2)0  | 87.9(4)    | O(2)-B(1)-Na(1)4  | 60.6(7)   |
| B(2)-K(1)-O(2)   | 131.3(4)   | O(2)5-B(1)-Na(1)4 | 60.6(7)   |
| B(2)-K(1)-O(2)   | 87.9(4)    | O(2)-B(1)-O(2)5   | 119.5(13) |
| B(2)-K(1)-O(2)1  | 131.3(4)   | O(3)-B(1)-La(1)   | 63.4(4)   |
| B(2)-K(1)-O(3)   | 72.0(3)    | O(3)-B(1)-La(1)   | 63.4(4)   |
| B(2)-K(1)-O(3)   | 72.0(3)    | O(3)-B(1)-K(1)3   | 111.8(11) |
| B(2)-K(1)-O(3)   | 72.0(3)    | O(3)-B(1)-Na(1)4  | 172.9(12) |

---

|                   |           |                   |            |
|-------------------|-----------|-------------------|------------|
| B(2)-K(1)-O(3)    | 72.0(3)   | O(3)-B(1)-O(2)    | 120.1(7)   |
| B(2)-K(1)-B(2)    | 129.8(9)  | O(3)-B(1)-O(2)5   | 120.1(7)   |
| Na(2)-Na(1)-Na(2) | 107.6(4)  | La(1)-B(2)-La(1)  | 112.3(8)   |
| O(2)-Na(1)-Na(2)  | 44.9(2)   | La(1)-B(2)-Na(2)1 | 123.8(4)   |
| O(2)-Na(1)-Na(2)  | 93.0(3)   | La(1)-B(2)-Na(2)1 | 123.8(4)   |
| O(2)2-Na(1)-Na(2) | 44.9(2)   | K(1)-B(2)-La(1)   | 103.66(11) |
| O(2)4-Na(1)-Na(2) | 44.9(2)   | K(1)-B(2)-La(1)   | 103.66(11) |
| O(2)3-Na(1)-Na(2) | 93.0(3)   | K(1)9-B(2)-La(1)  | 103.66(11) |
| O(2)2-Na(1)-Na(2) | 93.0(3)   | K(1)9-B(2)-La(1)  | 103.66(11) |
| O(2)4-Na(1)-Na(2) | 93.0(3)   | K(1)9-B(2)-K(1)   | 129.8(9)   |
| O(2)3-Na(1)-Na(2) | 44.9(2)   | K(1)9-B(2)-Na(2)1 | 64.9(5)    |
| O(2)-Na(1)-O(2)4  | 112.6(5)  | K(1)-B(2)-Na(2)1  | 64.9(5)    |
| O(2)-Na(1)-O(2)3  | 86.5(4)   | O(1)-B(2)-La(1)   | 175.2(15)  |
| O(2)2-Na(1)-O(2)  | 56.2(4)   | O(1)-B(2)-La(1)   | 62.9(8)    |
| O(2)2-Na(1)-O(2)3 | 112.6(5)  | O(1)-B(2)-La(1)   | 175.2(15)  |
| O(2)3-Na(1)-O(2)4 | 56.2(4)   | O(1)-B(2)-La(1)   | 62.9(8)    |
| O(2)2-Na(1)-O(2)4 | 86.5(4)   | O(1)-B(2)-K(1)    | 78.1(6)    |
| O(2)-Na(1)-O(4)   | 129.2(2)  | O(1)-B(2)-K(1)9   | 78.1(6)    |
| O(2)3-Na(1)-O(4)  | 129.2(2)  | O(1)-B(2)-K(1)    | 78.1(6)    |
| O(2)2-Na(1)-O(4)  | 75.2(3)   | O(1)-B(2)-K(1)9   | 78.1(6)    |
| O(2)3-Na(1)-O(4)  | 75.2(3)   | O(1)-B(2)-Na(2)1  | 60.9(11)   |
| O(2)2-Na(1)-O(4)  | 129.2(2)  | O(1)-B(2)-Na(2)1  | 60.9(11)   |
| O(2)-Na(1)-O(4)   | 75.2(3)   | O(1)-B(2)-O(1)    | 122(2)     |
| O(2)4-Na(1)-O(4)  | 75.2(3)   | O(1)-B(2)-O(4)    | 119.1(11)  |
| O(2)4-Na(1)-O(4)  | 129.2(2)  | O(1)-B(2)-O(4)    | 119.1(11)  |
| O(2)2-Na(1)-B(1)2 | 28.37(19) | O(4)-B(2)-La(1)   | 56.2(4)    |
| O(2)3-Na(1)-B(1)2 | 104.1(4)  | O(4)-B(2)-La(1)   | 56.2(4)    |
| O(2)2-Na(1)-B(1)3 | 104.1(4)  | O(4)-B(2)-K(1)    | 115.1(5)   |
| O(2)3-Na(1)-B(1)3 | 28.37(19) | O(4)-B(2)-K(1)9   | 115.1(5)   |
| O(2)4-Na(1)-B(1)3 | 28.37(19) | O(4)-B(2)-Na(2)1  | 180        |

Symmetry transformations used to generate equivalent atoms:

|                           |                           |                         |
|---------------------------|---------------------------|-------------------------|
| #1 $-x, -y+3/2, z+1/2$    | #2 $x-1, y+1/2, z+1/2$    | #3 $x-1, -y+1, z$       |
| #4 $-x+1, -y+1, z$        | #5 $-x+1, y+1/2, z+1/2$   | #6 $-x, -y+1, z$        |
| #7 $x+1, y, z$            | #8 $x, y+1/2, z-1/2$      | #9 $-x+1, y+1/2, z-1/2$ |
| #10 $x, -y+1/2, z-1/2$    | #11 $-x+1, -y+1/2, z-1/2$ | #12 $x, y+1/2, z+1/2$   |
| #13 $-x+1, -y+1/2, z+1/2$ | #14 $x, -y+1/2, z+1/2$    | #15 $-x, -y+1, z+1$     |
| #16 $x, y, z+1$           | #17 $x-1, -y+1/2, z+1/2$  | #18 $x-1, y, z+1$       |
| #19 $x-1, y, z$           | #20 $-x, -y+3/2, z-1/2$   | #21 $x, y, z-1$         |
| #22 $x+1, y-1/2, z-1/2$   | #23 $x, y-1/2, z+1/2$     | #24 $x, y-1/2, z-1/2$   |
| #25 $-x+1, y, z$          |                           |                         |

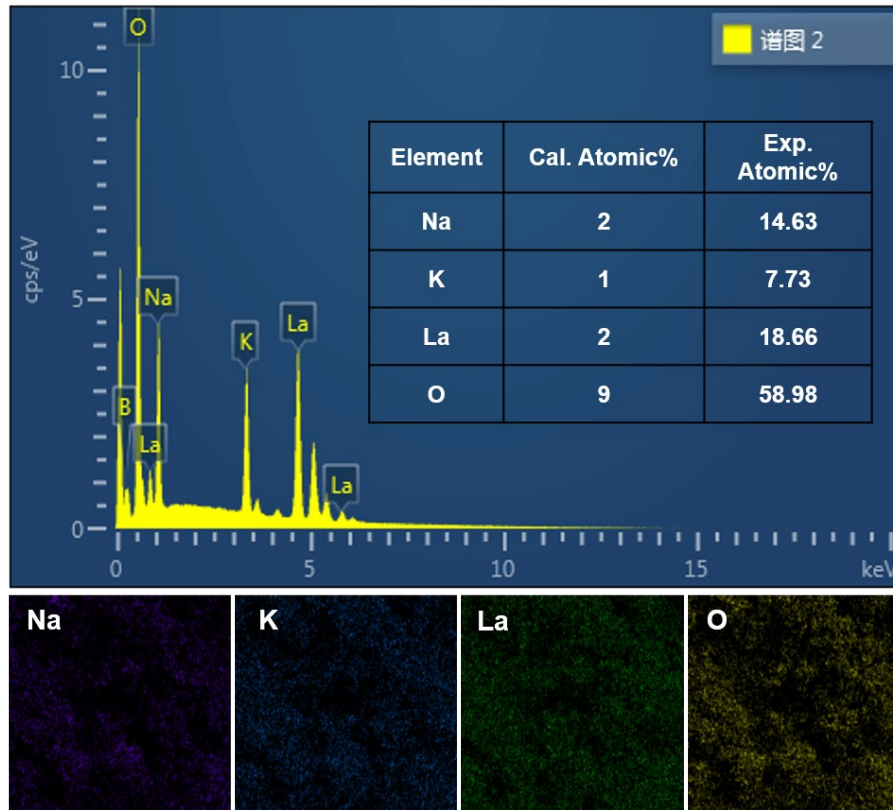

Fig S3. EDS spectrum of the  $\text{KNa}_2\text{La}_2(\text{BO}_3)_3$  compound and the corresponding average Na/K/La/O molar ratio.

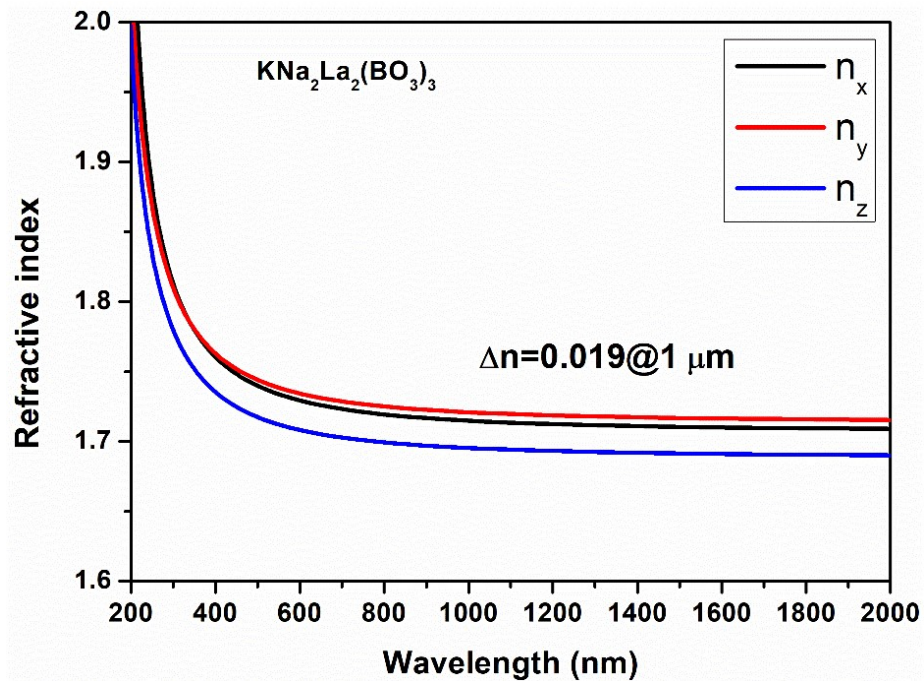

Fig S4. The calculated birefringence curves for  $\text{KNa}_2\text{La}_2(\text{BO}_3)_3$ .
